# Supplementary figures and images for: Blocking Gi/o-Coupled Signaling Eradicates Cancer Stem Cells and Sensitizes Breast Tumors to HER2-Targeted Therapies to Inhibit Tumor Relapse
Source: MDPI journal article supplement (doi:10.3390/cancers14071719), 2022-03-28

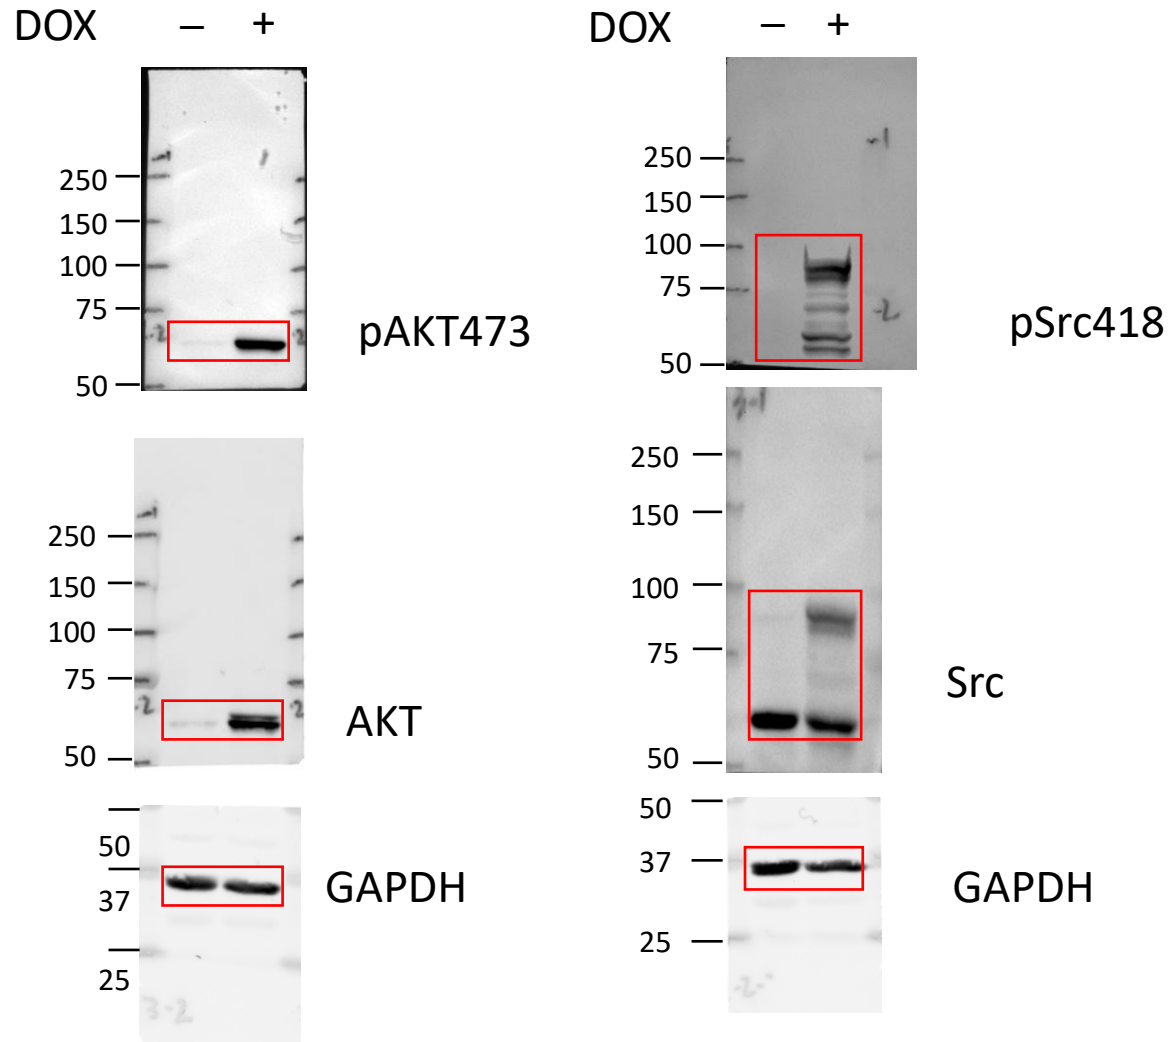

Supplemental Figure S1: The original blots for Figure 5E. The cropped bands are indicated by boxes.

Supplement: s1 [file s1]
